# Supplementary material for: Genetic Ancestry Estimates within Dutch Family Units and Across Genotyping Arrays: Insights from Empirical Analysis Using Two Estimation Methods
Source: MDPI journal article supplement (doi:10.3390/genes14071497), 2023-07-22
Supplement: s1 [file s1]

Supplementary Table 6 – Within family DZ twin/sibling pair differences in admixture proportions by genotyping array

|    | AFFY6 (N=2966) |           |        |        | AXIOM (N=591) |           |        |        | ILLGSA (N=3689) |           |        |        | Harmonized (N=8464) |           |        |        |
|----|----------------|-----------|--------|--------|---------------|-----------|--------|--------|-----------------|-----------|--------|--------|---------------------|-----------|--------|--------|
|    | MD             | SD        | MAD    | IQRAD  | MD            | SD        | MAD    | IQRAD  | MD              | SD        | MAD    | IQRAD  | MD                  | SD        | MAD    | IQRAD  |
| Q1 | 0.0001091      | 0.0218368 | 0.0144 | 0.0184 | -0.0010909    | 0.0208740 | 0.0144 | 0.0176 | 0.0003525       | 0.0183653 | 0.0126 | 0.0154 | 0.0007276           | 0.0324349 | 0.0219 | 0.0269 |
| Q2 | 0.0000416      | 0.0066079 | 0.0023 | 0.0056 | 0.0004513     | 0.0056273 | 0.0023 | 0.0054 | -0.0000435      | 0.0061190 | 0.0025 | 0.0051 | -0.0001435          | 0.0088039 | 0.0022 | 0.0077 |
| Q3 | 0.0000445      | 0.0169808 | 0.0115 | 0.0144 | 0.0002999     | 0.0164323 | 0.0115 | 0.0127 | 0.0002883       | 0.0141443 | 0.0094 | 0.012  | -0.0002675          | 0.0279527 | 0.0189 | 0.0237 |
| Q4 | -0.0005116     | 0.0255068 | 0.0173 | 0.0212 | 0.0004375     | 0.0233512 | 0.0173 | 0.0202 | -0.0005890      | 0.0202821 | 0.0138 | 0.0166 | -0.0005575          | 0.0386821 | 0.0258 | 0.0322 |
| Q5 | 0.0001855      | 0.0044754 | 0.0028 | 0.0039 | -0.0000242    | 0.0042301 | 0.0028 | 0.0039 | 0.0001141       | 0.0040468 | 0.0024 | 0.0034 | 0.0000168           | 0.0065354 | 0.0034 | 0.0066 |
| Q6 | -0.0000331     | 0.0041066 | 0.0020 | 0.0042 | 0.0000620     | 0.0037017 | 0.0020 | 0.0039 | -0.0000086      | 0.0036473 | 0.0017 | 0.0038 | 0.0000588           | 0.0054829 | 0.0013 | 0.0053 |
| Q7 | 0.0001313      | 0.0094434 | 0.0061 | 0.0081 | -0.0001375    | 0.0087924 | 0.0061 | 0.0081 | -0.0002554      | 0.0083539 | 0.0055 | 0.007  | 0.0002028           | 0.0130998 | 0.0075 | 0.0123 |
| Q8 | 0.0000234      | 0.0040089 | 0.0018 | 0.0042 | 0.0003426     | 0.0042484 | 0.0018 | 0.0043 | 0.0001301       | 0.0040864 | 0.0019 | 0.0038 | -0.0000872          | 0.0056071 | 0.0015 | 0.0053 |
| Q9 | 0.0000092      | 0.0052608 | 0.0020 | 0.0054 | -0.0003406    | 0.0053752 | 0.0020 | 0.0053 | 0.0000114       | 0.0050228 | 0.0018 | 0.0048 | 0.0000496           | 0.0075707 | 0.0015 | 0.0069 |

Q1-Q9 represent each of the nine ancestry populations as determined by ADMIXTURE, MD and SD are the mean and standard deviation of paired ancestry proportion differences, MAD = median absolute difference, IQRAD = interquartile range absolute difference of quartile 1 – quartile 3.
