# Supplementary material for: Genetic Ancestry Estimates within Dutch Family Units and Across Genotyping Arrays: Insights from Empirical Analysis Using Two Estimation Methods
Source: MDPI journal article supplement (doi:10.3390/genes14071497), 2023-07-22
Supplement: s1 [file s1]

Supplementary Table 3 – Within family DZ twin/sibling pair differences in PCs by genotyping array

|      | AFFY6 (N=2966) |           |        |        | AXIOM (N=591) |           |        |        | ILLGSA (N=3689) |           |        |        | Harmonized (N=8464) |           |        |        |
|------|----------------|-----------|--------|--------|---------------|-----------|--------|--------|-----------------|-----------|--------|--------|---------------------|-----------|--------|--------|
|      | MD             | SD        | MAD    | IQRAD  | MD            | SD        | MAD    | IQRAD  | MD              | SD        | MAD    | IQRAD  | MD                  | SD        | MAD    | IQRAD  |
| PC1  | -0.0000027     | 0.0002658 | 0.0002 | 0.0002 | -0.0000249    | 0.0002404 | 0.0002 | 0.0001 | 0.0000043       | 0.0002733 | 0.0001 | 0.0001 | -0.0000006          | 0.0003408 | 0.0002 | 0.0003 |
| PC2  | -0.0000179     | 0.0004050 | 0.0002 | 0.0003 | -0.0000218    | 0.0003827 | 0.0002 | 0.0003 | 0.0000124       | 0.0003816 | 0.0002 | 0.0002 | 0.0000050           | 0.0005172 | 0.0003 | 0.0004 |
| PC3  | 0.0000049      | 0.0006581 | 0.0004 | 0.0006 | 0.0000538     | 0.0006119 | 0.0004 | 0.0005 | 0.0000076       | 0.0005788 | 0.0004 | 0.0005 | 0.0000129           | 0.0009118 | 0.0006 | 0.0008 |
| PC4  | 0.0000281      | 0.0006870 | 0.0005 | 0.0006 | -0.0000294    | 0.0006448 | 0.0004 | 0.0006 | 0.0000062       | 0.0006056 | 0.0004 | 0.0005 | 0.0000008           | 0.0009624 | 0.0006 | 0.0008 |
| PC5  | -0.0000189     | 0.0015276 | 0.0010 | 0.0012 | 0.0000088     | 0.0019236 | 0.0014 | 0.0017 | 0.0000002       | 0.0017806 | 0.0012 | 0.0014 | -0.0000367          | 0.0022051 | 0.0015 | 0.0018 |
| PC6  | -0.0000097     | 0.0020585 | 0.0014 | 0.0017 | 0.0001037     | 0.0015581 | 0.0010 | 0.0013 | 0.0000539       | 0.0016400 | 0.0011 | 0.0014 | -0.0000418          | 0.0028650 | 0.0020 | 0.0024 |
| PC7  | -0.0000297     | 0.0013230 | 0.0009 | 0.0010 | 0.0000091     | 0.0013700 | 0.0009 | 0.0011 | 0.0000183       | 0.0016578 | 0.0011 | 0.0014 | 0.0000016           | 0.0023673 | 0.0016 | 0.0019 |
| PC8  | 0.0000152      | 0.0017449 | 0.0012 | 0.0015 | -0.0000959    | 0.0022387 | 0.0016 | 0.0020 | 0.0000259       | 0.0012354 | 0.0008 | 0.0010 | -0.0000485          | 0.0027616 | 0.0019 | 0.0023 |
| PC9  | -0.0000432     | 0.0022698 | 0.0015 | 0.0019 | -0.0001530    | 0.0015666 | 0.0011 | 0.0014 | -0.0000784      | 0.0020788 | 0.0014 | 0.0018 | -0.0000309          | 0.0033817 | 0.0022 | 0.0027 |
| PC10 | -0.0000735     | 0.0021903 | 0.0015 | 0.0018 | -0.0000922    | 0.0022229 | 0.0016 | 0.0018 | -0.0000031      | 0.0014639 | 0.0010 | 0.0013 | -0.0000133          | 0.0033483 | 0.0022 | 0.0027 |

MD and SD are the mean and standard deviation of paired principal component differences, MAD = median absolute difference, IQRAD = interquartile range absolute difference of quartile 1 – quartile 3.
