# Supplementary material for: Genetic Ancestry Estimates within Dutch Family Units and Across Genotyping Arrays: Insights from Empirical Analysis Using Two Estimation Methods
Source: MDPI journal article supplement (doi:10.3390/genes14071497), 2023-07-22
Supplement: s1 [file s1]

Supplementary Table 5 – Within family MZ twin differences in ancestry proportions by genotyping array

|    | AFFY6 (N=1279) |           |        |        | AXIOM (N=433) |           |        |        | ILLGSA (N=1546) |           |        |        | Harmonized (N=3406) |           |        |        |
|----|----------------|-----------|--------|--------|---------------|-----------|--------|--------|-----------------|-----------|--------|--------|---------------------|-----------|--------|--------|
|    | MD             | SD        | MAD    | IQRAD  | MD            | SD        | MAD    | IQRAD  | MD              | SD        | MAD    | IQRAD  | MD                  | SD        | MAD    | IQRAD  |
| Q1 | -0.0000237     | 0.0022813 | 0.0013 | 0.0018 | -0.0002526    | 0.0022389 | 0.0011 | 0.0016 | 0.0000071       | 0.0009782 | 0.0004 | 0.0005 | -0.0000953          | 0.0038340 | 0.0015 | 0.0028 |
| Q2 | 0.0000270      | 0.0012185 | 0.0002 | 0.0009 | -0.0000023    | 0.0008463 | 0.0002 | 0.0007 | -0.0000115      | 0.0005284 | 0.0001 | 0.0003 | 0.0000143           | 0.0014961 | 0.0000 | 0.0007 |
| Q3 | -0.0000005     | 0.0020525 | 0.0012 | 0.0016 | -0.0000082    | 0.0020162 | 0.0010 | 0.0015 | 0.0000181       | 0.0009788 | 0.0003 | 0.0006 | 0.0000385           | 0.0035242 | 0.0013 | 0.0024 |
| Q4 | 0.0000402      | 0.0049464 | 0.0018 | 0.0027 | 0.0003037     | 0.0033462 | 0.0017 | 0.0025 | -0.0000141      | 0.0013523 | 0.0005 | 0.0007 | 0.0001686           | 0.0055211 | 0.0020 | 0.0038 |
| Q5 | 0.0000148      | 0.0007813 | 0.0003 | 0.0006 | -0.0000164    | 0.0005789 | 0.0002 | 0.0005 | -0.0000032      | 0.0003113 | 0.0001 | 0.0002 | -0.0000189          | 0.0010212 | 0.0002 | 0.0007 |
| Q6 | 0.0000550      | 0.0015490 | 0.0003 | 0.0010 | -0.0000545    | 0.0009789 | 0.0002 | 0.0006 | 0.0000016       | 0.0004610 | 0      | 0.0002 | -0.0000358          | 0.0013595 | 0.0000 | 0.0004 |
| Q7 | -0.0000285     | 0.0016026 | 0.0007 | 0.0012 | -0.0000099    | 0.0012470 | 0.0006 | 0.001  | -0.0000011      | 0.0006435 | 0.0002 | 0.0003 | -0.0000667          | 0.0021005 | 0.0005 | 0.0015 |
| Q8 | -0.0000545     | 0.0021503 | 0.0003 | 0.0010 | 0.0000075     | 0.0011565 | 0.0001 | 0.0006 | -0.0000215      | 0.0004775 | 0      | 0.0002 | -0.0000230          | 0.0014435 | 0.0000 | 0.0005 |
| Q9 | -0.0000298     | 0.0010583 | 0.0001 | 0.0008 | 0.0000326     | 0.0007626 | 0      | 0.0005 | 0.0000245       | 0.0004302 | 0      | 0.0002 | 0.0000183           | 0.0014032 | 0.0000 | 0.0006 |

Q1-Q9 represent each of the nine ancestry populations as determined by ADMIXTURE, MD and SD are the mean and standard deviation of paired ancestry proportion differences, MAD = median absolute difference, IQRAD = interquartile range absolute difference of quartile 1 – quartile 3.
