# Supplementary material for: Genetic Ancestry Estimates within Dutch Family Units and Across Genotyping Arrays: Insights from Empirical Analysis Using Two Estimation Methods
Source: MDPI journal article supplement (doi:10.3390/genes14071497), 2023-07-22
Supplement: s1 [file s1]

Supplementary Table 4 – Descriptive statistics of admixture proportions of NTR participants

|    | AFFY6  |        |        |        |        |  | AXIOM  |        |        |        |        |  | ILLGSA |        |        |        |        |  | HARMONIZED |        |        |        |        |  |
|----|--------|--------|--------|--------|--------|--|--------|--------|--------|--------|--------|--|--------|--------|--------|--------|--------|--|------------|--------|--------|--------|--------|--|
|    | Mean   | SD     | Min    | Max    | Range  |  | Mean   | SD     | Min    | Max    | Range  |  | Mean   | SD     | Min    | Max    | Range  |  | Mean       | SD     | Min    | Max    | Range  |  |
| Q1 | 0.1869 | 0.0587 | 0.0000 | 0.7468 | 0.7468 |  | 0.1908 | 0.0663 | 0.0039 | 0.7405 | 0.7366 |  | 0.1948 | 0.0596 | 0.0000 | 0.7194 | 0.7194 |  | 0.1878     | 0.0658 | 0.0000 | 0.7608 | 0.7608 |  |
| Q2 | 0.0112 | 0.0527 | 0.0000 | 0.8731 | 0.8731 |  | 0.0114 | 0.0538 | 0.0000 | 0.8164 | 0.8164 |  | 0.0106 | 0.0505 | 0.0000 | 0.8937 | 0.8937 |  | 0.0113     | 0.0511 | 0.0000 | 0.8807 | 0.8807 |  |
| Q3 | 0.0725 | 0.0220 | 0.0000 | 0.4332 | 0.4332 |  | 0.0726 | 0.0212 | 0.0000 | 0.3204 | 0.3204 |  | 0.0756 | 0.0206 | 0.0000 | 0.6184 | 0.6184 |  | 0.0702     | 0.0312 | 0.0000 | 0.6213 | 0.6213 |  |
| Q4 | 0.6949 | 0.0919 | 0.0000 | 0.9314 | 0.9314 |  | 0.6868 | 0.1041 | 0.0000 | 0.8588 | 0.8588 |  | 0.6833 | 0.0954 | 0.0000 | 0.9218 | 0.9218 |  | 0.6936     | 0.1024 | 0.0000 | 0.9575 | 0.9575 |  |
| Q5 | 0.0054 | 0.0100 | 0.0000 | 0.4484 | 0.4484 |  | 0.0054 | 0.0138 | 0.0000 | 0.5075 | 0.5074 |  | 0.0055 | 0.0117 | 0.0000 | 0.5525 | 0.5525 |  | 0.0060     | 0.0126 | 0.0000 | 0.5576 | 0.5575 |  |
| Q6 | 0.0036 | 0.0154 | 0.0000 | 0.4681 | 0.4681 |  | 0.0049 | 0.0216 | 0.0000 | 0.4586 | 0.4585 |  | 0.0041 | 0.0186 | 0.0000 | 0.5581 | 0.5581 |  | 0.0043     | 0.0185 | 0.0000 | 0.5584 | 0.5584 |  |
| Q7 | 0.0171 | 0.0419 | 0.0000 | 0.8840 | 0.8840 |  | 0.0189 | 0.0530 | 0.0000 | 0.8491 | 0.8491 |  | 0.0174 | 0.0400 | 0.0000 | 0.9001 | 0.9001 |  | 0.0173     | 0.0442 | 0.0000 | 0.9330 | 0.9330 |  |
| Q8 | 0.0039 | 0.0167 | 0.0000 | 0.5172 | 0.5171 |  | 0.0049 | 0.0229 | 0.0000 | 0.5952 | 0.5952 |  | 0.0043 | 0.0197 | 0.0000 | 0.6412 | 0.6412 |  | 0.0044     | 0.0199 | 0.0000 | 0.6672 | 0.6672 |  |
| Q9 | 0.0045 | 0.0144 | 0.0000 | 0.5465 | 0.5465 |  | 0.0042 | 0.0123 | 0.0000 | 0.3438 | 0.3438 |  | 0.0043 | 0.0205 | 0.0000 | 0.7515 | 0.7515 |  | 0.0050     | 0.0183 | 0.0000 | 0.7733 | 0.7733 |  |

Q1-Q9 represent each of the nine ancestry populations as determined by ADMIXTURE, SD=standard deviation, Min=minimum, Max=maximum
