# Supplementary material for: Genetic Ancestry Estimates within Dutch Family Units and Across Genotyping Arrays: Insights from Empirical Analysis Using Two Estimation Methods
Source: MDPI journal article supplement (doi:10.3390/genes14071497), 2023-07-22
Supplement: s1 [file s1]

Supplementary Table 1 – Descriptive statistics of principal components of NTR participants

|      | AFFY6   |        |         |        |        | AXIOM   |        |         |        |        | ILLGSA  |        |         |        |        | HARMONIZED |        |         |        |        |
|------|---------|--------|---------|--------|--------|---------|--------|---------|--------|--------|---------|--------|---------|--------|--------|------------|--------|---------|--------|--------|
|      | Mean    | SD     | Min     | Max    | Range  | Mean    | SD     | Min     | Max    | Range  | Mean    | SD     | Min     | Max    | Range  | Mean       | SD     | Min     | Max    | Range  |
| PC1  | 0.0112  | 0.0015 | -0.0338 | 0.0121 | 0.0459 | 0.0114  | 0.0022 | -0.0313 | 0.0124 | 0.0437 | 0.0143  | 0.0022 | -0.0352 | 0.0156 | 0.0508 | 0.0116     | 0.0019 | -0.0359 | 0.0130 | 0.0489 |
| PC2  | 0.0176  | 0.0037 | -0.0344 | 0.0194 | 0.0538 | 0.0174  | 0.0038 | -0.0342 | 0.0191 | 0.0533 | 0.0159  | 0.0037 | -0.0365 | 0.0176 | 0.0541 | 0.0172     | 0.0037 | -0.0368 | 0.0196 | 0.0564 |
| PC3  | -0.0070 | 0.0023 | -0.0196 | 0.0395 | 0.0591 | -0.0069 | 0.0029 | -0.0191 | 0.0385 | 0.0576 | 0.0070  | 0.0023 | -0.0422 | 0.0197 | 0.0619 | -0.0068    | 0.0025 | -0.0240 | 0.0431 | 0.0671 |
| PC4  | -0.0087 | 0.0015 | -0.0161 | 0.0380 | 0.0541 | -0.0085 | 0.0020 | -0.0147 | 0.0446 | 0.0593 | 0.0083  | 0.0017 | -0.0500 | 0.0164 | 0.0664 | -0.0089    | 0.0019 | -0.0176 | 0.0475 | 0.0651 |
| PC5  | 0.0020  | 0.0033 | -0.0403 | 0.0284 | 0.0687 | 0.0059  | 0.0056 | -0.0442 | 0.0266 | 0.0708 | 0.0061  | 0.0053 | -0.0478 | 0.0501 | 0.0979 | 0.0004     | 0.0033 | -0.0469 | 0.0423 | 0.0892 |
| PC6  | 0.0069  | 0.0049 | -0.0452 | 0.0327 | 0.0779 | 0.0035  | 0.0036 | -0.0226 | 0.0401 | 0.0627 | -0.0083 | 0.0041 | -0.0350 | 0.0288 | 0.0638 | 0.0069     | 0.0057 | -0.0525 | 0.0481 | 0.1006 |
| PC7  | -0.0002 | 0.0014 | -0.0055 | 0.0052 | 0.0107 | 0.0002  | 0.0014 | -0.0095 | 0.0222 | 0.0317 | -0.0073 | 0.0041 | -0.0289 | 0.0345 | 0.0634 | -0.0005    | 0.0024 | -0.0310 | 0.0197 | 0.0507 |
| PC8  | 0.0049  | 0.0023 | -0.0131 | 0.0134 | 0.0265 | 0.0113  | 0.0050 | -0.0251 | 0.0231 | 0.0482 | -0.0002 | 0.0013 | -0.0179 | 0.0332 | 0.0511 | 0.0035     | 0.0030 | -0.0308 | 0.0163 | 0.0471 |
| PC9  | 0.0112  | 0.0045 | -0.0206 | 0.0303 | 0.0509 | -0.0038 | 0.0022 | -0.0112 | 0.0087 | 0.0199 | 0.0003  | 0.0025 | -0.0181 | 0.0190 | 0.0371 | 0.0112     | 0.0054 | -0.0309 | 0.0315 | 0.0624 |
| PC10 | 0.0004  | 0.0023 | -0.0085 | 0.0152 | 0.0237 | 0.0005  | 0.0022 | -0.0123 | 0.0091 | 0.0214 | -0.0006 | 0.0017 | -0.0307 | 0.0109 | 0.0416 | -0.0006    | 0.0034 | -0.0174 | 0.0180 | 0.0354 |

PC1-PC10=principal components 1 through 10, SD=standard deviation, Min=minimum, Max=maximum
