# Supplementary material for: Genetic Ancestry Estimates within Dutch Family Units and Across Genotyping Arrays: Insights from Empirical Analysis Using Two Estimation Methods
Source: MDPI journal article supplement (doi:10.3390/genes14071497), 2023-07-22
Supplement: s1 [file s1]

Supplementary Table 2 - Within family MZ twin pair differences in PCs by genotyping array

|      | AFFY6 (N=1279) |           |        |        | AXIOM (N=433) |           |        |        | ILLGSA (N=1546) |           |        |        | Harmonized (N=3406) |           |        |        |
|------|----------------|-----------|--------|--------|---------------|-----------|--------|--------|-----------------|-----------|--------|--------|---------------------|-----------|--------|--------|
|      | MD             | SD        | MAD    | IQRAD  | MD            | SD        | MAD    | IQRAD  | MD              | SD        | MAD    | IQRAD  | MD                  | SD        | MAD    | IQRAD  |
| PC1  | 0.0000020      | 0.0001606 | 0.0001 | 0.0001 | 0.0000014     | 0.0001309 | 0      | 0.0001 | -0.0000002      | 0.0001520 | 0      | 0.0001 | 0.0000042           | 0.0001432 | 0      | 0.0001 |
| PC2  | 0.0000013      | 0.0001771 | 0.0001 | 0.0001 | 0.0000012     | 0.0001436 | 0.0001 | 0.0001 | -0.0000039      | 0.0001722 | 0      | 0.0001 | 0.0000022           | 0.0001929 | 0      | 0.0001 |
| PC3  | -0.0000038     | 0.0001050 | 0.0001 | 0.0001 | -0.0000025    | 0.0000973 | 0.0001 | 0.0001 | -0.0000018      | 0.0000819 | 0      | 0.0001 | -0.0000041          | 0.0001296 | 0.0001 | 0.0001 |
| PC4  | 0.0000000      | 0.0001178 | 0.0001 | 0.0001 | 0             | 0.0000962 | 0.0001 | 0.0001 | 0.0000007       | 0.0001031 | 0      | 0.0001 | -0.0000041          | 0.0001392 | 0.0001 | 0.0001 |
| PC5  | -0.0000085     | 0.0001717 | 0.0001 | 0.0002 | 0.0000187     | 0.0002288 | 0.0001 | 0.0001 | -0.0000017      | 0.0001378 | 0      | 0.0001 | -0.0000001          | 0.0002559 | 0.0001 | 0.0002 |
| PC6  | -0.0000010     | 0.0002334 | 0.0001 | 0.0001 | 0.0000058     | 0.0001777 | 0.0001 | 0.0002 | 0.0000026       | 0.0001419 | 0      | 0.0001 | 0.0000102           | 0.0003171 | 0.0001 | 0.0002 |
| PC7  | 0.0000034      | 0.0002173 | 0.0001 | 0.0001 | 0.0000115     | 0.0002006 | 0.0001 | 0.0001 | 0.0000026       | 0.0001357 | 0.0001 | 0.0001 | -0.0000076          | 0.0002859 | 0.0001 | 0.0002 |
| PC8  | 0.0000099      | 0.0002456 | 0.0001 | 0.0001 | 0.0000088     | 0.0002843 | 0.0001 | 0.0002 | -0.0000010      | 0.0001044 | 0      | 0.0001 | 0.0000104           | 0.0003477 | 0.0001 | 0.0002 |
| PC9  | -0.0000005     | 0.0002663 | 0.0001 | 0.0002 | 0.0000229     | 0.0002111 | 0.0001 | 0.0001 | 0.0000033       | 0.0001463 | 0.0001 | 0.0001 | 0.0000027           | 0.0003933 | 0.0002 | 0.0003 |
| PC10 | 0.0000024      | 0.0002565 | 0.0001 | 0.0002 | 0.0000136     | 0.0002727 | 0.0002 | 0.0002 | 0.0000025       | 0.0001324 | 0      | 0.0001 | 0.0000046           | 0.0003907 | 0.0002 | 0.0003 |

MD and SD are the mean and standard deviation of paired principal component differences, MAD = median absolute difference, IQRAD = interquartile range absolute difference of quartile 1 – quartile 3
